# Supplementary material for: Patients' perception of risk presentation of medication side effects: implications for medication counselling, safety and adherence
Source: Research Square preprint supplement (doi:10.21203/rs.3.rs-6203921/v1), 2025-07-01
Supplement: Supplementary file 1 [file 5c17677f93e2af16b2c68367.docx]

**Dear Respondent**

This questionnaire is about your understanding and interpretation of the side effects and adverse drug reactions listed in drug information leaflet in medication packs. **Some common drugs have been selected and we would like to know how you will interpret and your understanding of some of the side effects extracted from the leaflets based on the way they are written in the leaflets.** This will not take much of your time and information provided will be treated with utmost confidentiality. Thank you for considering taking part in the study. Kindly answer the questions to the best of your ability.

**Section 1: Socio-demographic information (***kindly write or tick the appropriate answer***)**

**Sex:** Male ( ) Female ( ); **Age**: ________(yrs); **Ethnicity**: _________________

**Religion**: Christianity ( ) Islam ( ) Traditional ( ) Others please specify_________________

**Highest academic qualification obtained**: Primary/Secondary education ( ) Tertiary education ( ) Postgraduate education ( ) Others please specify ________________________`

**Marital status**: Single ( ) Married ( ) Divorced ( ) Widowed ( ) Separated ( )

**Working status**: Public sector ( ) Private sector ( ) Self-employed ( ) Unemployed ( )

**SECTION 2: Evaluation of reaction to risk of side effects listed in medication package inserts**

**Kindly tick/circle the appropriate box/number for your answer using the graded response format below:**

**Never – 1**

**Rarely – 2**

**Often – 3**

**Every time – 4**

|  | **Statement** | **1** | **2** | **3** | **4** |
| --- | --- | --- | --- | --- | --- |
| **1** | How often do you check medication package inserts for the description of the side effects of the drug you want to use? |  |  |  |  |
| **2** | How often do you get worried over the description of the side effect of a drug that you want to use? |  |  |  |  |
| **3** | How often do you seek for clarification from health professionals on some listed side effect of your drug that bothers you? |  |  |  |  |
| **4** | How often do you continue to take the medication that you have worries over some of the side effects listed in the medication package inserts? |  |  |  |  |
| **5** | How often do you stop taking you drug because of the concern that you have for the side effect of the drug listed in the medication package insert? |  |  |  |  |
| **6** | How often do you experience some of the listed side effects in the medication package inserts of the drug you have taken before? |  |  |  |  |

**SECTION 3: Imaginary cases to evaluate your understanding of the presentation of the risk of side effects of drugs in medication package inserts**

**PLEASE DO NOT ANSWER THE QUESTIONS BASED ON YOUR PERSONAL EXPERIENCE(S) OF SIDE EFFECTS WITH ANY OF THE DRUGS.**

**WE NEED YOU TO IMAGINE IF THE WAY THE SIDE EFFECTS OF EACH DRUG ARE DESCRIBED, WOULD AFFECT YOUR USAGE OF THE DRUG.**

The risk of occurrence of side effects may be described in medication package inserts in three different ways described below. Which of the description of risk of occurrence of side effect would you prefer to see in medication package inserts? Please tick the appropriate box (you can only chose one answer

1. Skin rash occurs in 0.1% - 1% of patients or users. [ ]
2. Skin rash occurs in less than 1 per 10 but more than 1 per 100 of patients or users. [ ]
3. Skin rash is common among patients or users. [ ]

**DRUG A**

**In this imaginary situation your doctor has told you that you are anorexic (loss of appetite – you are unable to eat well) and you need to take the appetite stimulant Pizotifen 0.5mg tablets on the first day and from the second day twice daily for 2 weeks.**

- Kindly read the information below about the side effects that could be experienced with taking the drug, Pizotifen.
- Then answer the questions that follows.
- You can read the imaginary situation and the instructions again when answering the questions.

*Kindly note that we are concerned about your first understanding of the side effect – please do not spend too much time thinking about your answers.*

**Pizotifen has some side effects when it is taken. These includes:**

- **Increased weight** occurs in **≥10%** of patients or users
- **Face oedema (swelling)** occurs in **0.01- 0.1%** of patients or users

Kindly answer the following questions below: Please circle the appropriate number corresponding to your response choice

1. Overall, how satisfied are you with the way the **risk of occurrence of increased weight side effect** from Pizotifen is described as **≥10%**?

**Not satisfied at all 1 2 3 4 5 6 Very satisfied**

1. Overall, how satisfied are you with the way the **risk of occurrence of face oedema (swelling) side effect** from Pizotifen is described as **0.01- 0.1%**?

**Not satisfied at all 1 2 3 4 5 6 Very satisfied**

1. Thinking about the information you have just read, how severe is the increased weight side effect of Pizotifen?

**Not at all severe 1 2 3 4 5 6 Very severe**

1. Thinking about the information you have just read, how severe is the face oedema (swelling) side effect of Pizotifen?

**Not at all severe 1 2 3 4 5 6 Very severe**

1. From the information you have just read, how likely is it that you would have at least one of the side effects from Pizotifen if you take the drug?

**No at all likely 1 2 3 4 5 6 Very likely**

1. Thinking about the information you have just read, what do you think is the general risk to health from taking Pizotifen?

**No risk at all 1 2 3 4 5 6 Very high risk**

1. How much would the increased weight side effect information you have just read affect your decision to continue taking Pizotifen?

**Definitely will not affect 1 2 3 4 5 6 Definitely will affect**

1. How much would the face oedema side effect information you have just read affect your decision to continue taking Pizotifen?

**Definitely will not affect 1 2 3 4 5 6 Definitely will affect**

1. What do you think is the chance that you will have increased weight from taking Pizotifen?

**Please state in percentage _____________**

1. What do you think is the chance that you will have face oedema from taking Pizotifen?

**Please state in percentage ______________**

**DRUG B**

**In this imaginary situation, your doctor has told you that you have mild arthritis (joint pain) and you need to take the Diclofenac 50mg, twice daily for 2 weeks.**

- Kindly read the information below about the side effects that could be experienced with taking the drug, Diclofenac.
- Then answer the questions that follows.
- You can read the imaginary situation and the instructions again when answering the questions.

*Kindly note that we are concerned about your first understanding of the side effect – please do not spend too much time thinking about your answers.*

**Diclofenac has some side effects when it is taken. These includes:**

- **Anaemia**  occurs in **<0.01%** of patients or users
- **Abdominal Pain** occurs in **>1% and <10%** of patients or users

Kindly answer the following questions below: Please circle the appropriate number corresponding to your response choice:

1. Overall, how satisfied are you with the way the **risk of occurrence anaemia side effect** from Diclofenac is described as **<0.01%**?

**Not satisfied at all 1 2 3 4 5 6 Very satisfied**

1. Overall, how satisfied are you with the way the **risk of occurrence abdominal pain side effect** from Diclofenac is described as **>1% and <10%**?

**Not satisfied at all 1 2 3 4 5 6 Very satisfied**

1. Thinking about the information you have just read, how severe is the anemia side effect of Diclofenac?

**Not at all severe 1 2 3 4 5 6 Very severe**

1. Thinking about the information you have just read, how severe is the abdominal pain side effect of Diclofenac?

**Not at all severe 1 2 3 4 5 6 Very severe**

1. From the information you have just read how likely is it that you would have at least one of the side effects from Diclofenac?

**Not at all likely 1 2 3 4 5 6 Very likely**

1. Thinking about the information you have just read, what do you think is the general risk to health from taking Diclofenac?

**Not risk at all 1 2 3 4 5 6 Very high risk**

1. How much would the **anaemia** side effect information you have just read affect your decision to continue taking Diclofenac?

**Definitely will not affect 1 2 3 4 5 6 Definitely will affect**

1. How much would the **abdominal pain** side effect information you have just read affect your decision to continue taking Diclofenac?

**Definitely will not affect 1 2 3 4 5 6 Definitely will affect**

1. What do you think is the chance that you will have **anaemia** from taking Diclofenac?

**Please state in percentage _____________**

1. What do you think is the chance that you will have **abdominal pain** from taking Diclofenac?

**Please state in percentage _____________**

**DRUG C**

**In this imaginary situation your doctor has told you that you have otitis media (middle ear infection) and you need to take the antibiotic, Amoxicillin 500mg, three times daily for five days.**

- Kindly read the information below about the side effects that could be experienced with taking the drug, Amoxicillin.
- Then answer the questions that follows.
- You can read the imaginary situation and the instructions again when answering the questions.

*Kindly note that we are concerned about your first understanding of the side effect – please do not spend too much time thinking about your answers.*

**Amoxicillin has some side effects when it is taken. These includes:**

- **Skin Rash** occurs in >**1% and < 10%** of patients or users
- **Vomiting** occurs in **0.1% and 1%** of patients or users

Kindly answer the following questions below:

1. Overall, how satisfied are you with the way the **risk of occurrence skin rash side effect** from Amoxicillin is described as >**1% and < 10%**?

**Not satisfied at all 1 2 3 4 5 6 Very satisfied**

1. Overall, how satisfied are you with the way the **risk of occurrence vomiting side effect** from Amoxicillin is described as **0.1% and 1%**?

**Not satisfied at all 1 2 3 4 5 6 Very satisfied**

1. Thinking about the information you have just read, how severe is the skin rash side effect of Amoxicillin?

**Not at all severe 1 2 3 4 5 6 Very severe**

1. Thinking about the information you have just read, how severe is the vomiting side effect of Amoxicillin?

**Not at all severe 1 2 3 4 5 6 Very severe**

1. From the information you have just read, how likely is it that you would have at least one of the side effects from Amoxicillin?

**Not at all likely 1 2 3 4 5 6 Very likely**

1. Thinking about the information you have just read, what do you think is the general risk to health from Amoxicillin?

**No risk at all 1 2 3 4 5 6 Very high risk**

1. How much would the **skin rash** side effect information you have just read affect your decision to continue taking Amoxicillin?

**Definitely will not affect 1 2 3 4 5 6 Definitely will affect**

1. How much would the **vomiting** side effect information you have just read affect your decision to continue taking Amoxicillin?

**Definitely will not affect 1 2 3 4 5 6 Definitely will affect**

1. What do you think is the chance that you will have **skin rash** from taking Amoxicillin?

**Please state in percentage _____________**

1. What do you think is the chance that you will have **vomiting** from taking Amoxicillin?

**Please state in percentage _____________**
